# Supplementary material for: Integrative molecular characterization of pediatric spinal ependymoma: the UK Children’s Cancer and Leukaemia Group study
Source: PubMed Central journal article supplement (PMC8134525; doi:10.1093/noajnl/vdab043), 2021-03-08
Supplement: vdab043_suppl_supplementary_figures.pdf [file vdab043_suppl_supplementary_figures.pdf]

## Supplementary material

### **Integrative molecular characterization of pediatric spinal ependymoma: The UK Children's Cancer and Leukaemia Group study**

Omar Ahmad<sup>1</sup>, Rebecca Chapman<sup>1</sup>, Lisa C. Storer<sup>1</sup>, Li Luo<sup>2</sup>, Paul R. Heath<sup>3</sup>, Linda Resar<sup>2</sup>, Kenneth J. Cohen<sup>2</sup>, Richard G. Grundy<sup>1</sup>, Anbarasu Lourdasamy<sup>1</sup>

|                                                                                                                                                                                                 |   |
|-------------------------------------------------------------------------------------------------------------------------------------------------------------------------------------------------|---|
| <b>Figure S1.</b> Unsupervised analyses of 27 pediatric spinal ependymomas using DNA methylation profiles .....                                                                                 | 3 |
| <b>Figure S2.</b> Assignment of grade II and III pediatric spinal ependymomas using DNA methylation profiles.....                                                                               | 5 |
| <b>Figure S3.</b> Assignment of grade II and III pediatric spinal ependymomas using DNA methylation profiles.....                                                                               | 5 |
| <b>Figure S4.</b> Subgroup-associated gene signature .....                                                                                                                                      | 6 |
| <b>Figure S5.</b> Differentially methylated distal probes between SP-MPE and SP-EPN subgroups of pediatric spinal ependymoma.....                                                               | 7 |
| <b>Figure S6.</b> DNA methylation CpG probe-gene pairs correlation between methylation and gene expression.....                                                                                 | 8 |
| <b>Table S1.</b> Clinical and histopathological data associated with all pediatric spinal ependymomas analysed in this study, along with molecular subgroup assignment                          |   |
| <b>Table S2.</b> Summary of focal amplifications detected in spinal ependymoma by GISTIC2                                                                                                       |   |
| <b>Table S3.</b> Summary of focal deletions detected in spinal ependymoma by GISTIC2                                                                                                            |   |
| <b>Table S4.</b> List of significant pathways enriched by Gene Set Enrichment Analysis in SP-MPE subgroup                                                                                       |   |
| <b>Table S5.</b> List of significant pathways enriched by Gene Set Enrichment Analysis in SP-EPN subgroup                                                                                       |   |
| <b>Table S6.</b> List of significant pathways enriched in differentially methylated regions (DMR) that have high methylation levels in SP-MPE                                                   |   |
| <b>Table S7.</b> List of significant pathways enriched in differentially methylated regions (DMR) that have low methylation levels in SP-MPE                                                    |   |
| <b>Table S8.</b> List of CpG probe - gene pairs with low methylation and high gene expression levels in SP-MPE                                                                                  |   |
| <b>Table S9.</b> List of CpG probe - gene pairs with high methylation and low gene expression levels in SP-MPE                                                                                  |   |
| <b>Table S10.</b> Summary of significant transcription factor (TF) with motifs enriched among the list of CpG probe - gene pairs with high methylation and low gene expression levels in SP-MPE |   |

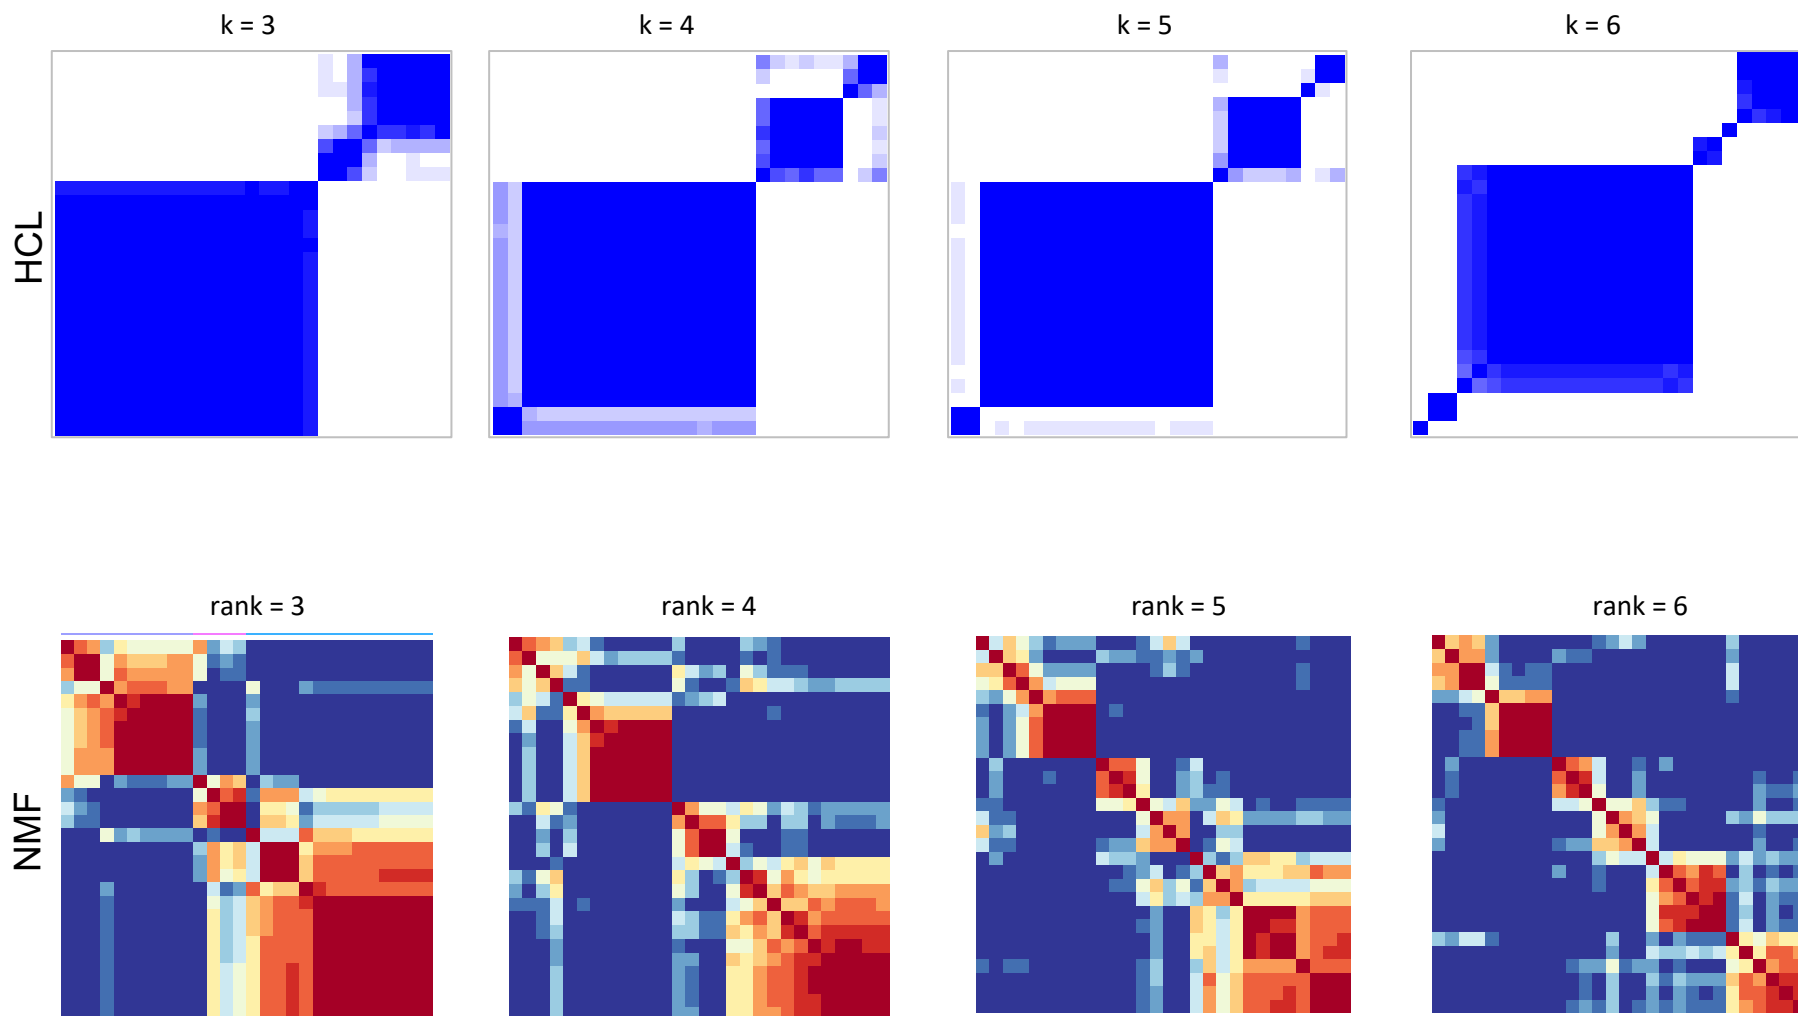

**Supplementary figure S1.** Unsupervised consensus hierarchical clustering (HCL) and non-negative matrix factorization (NMF) of 27 pediatric spinal ependymoma DNA methylation from a rank 2 to 6 classification.

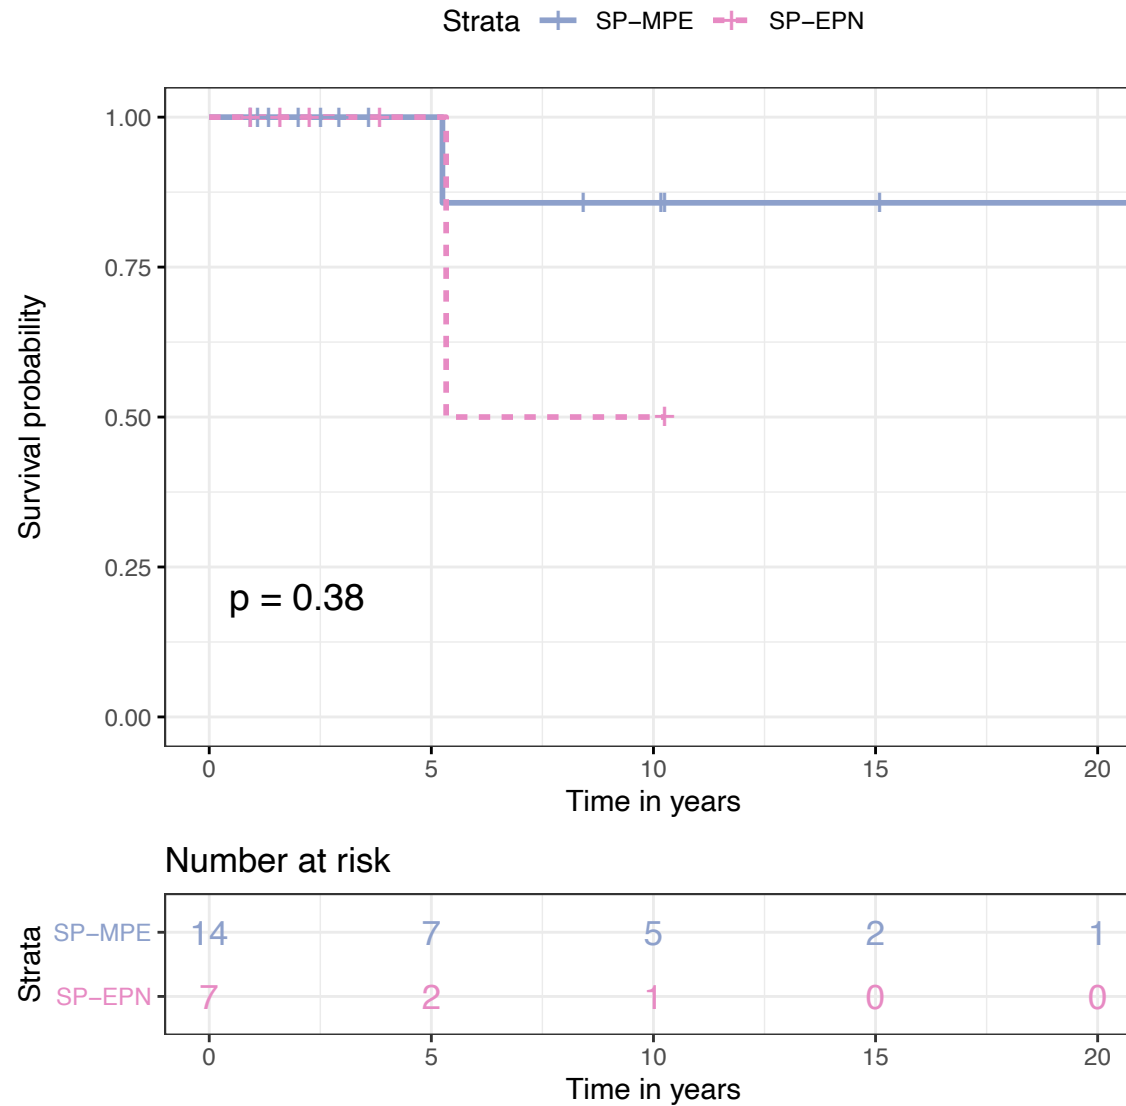

**Supplementary figure S2.** Kaplan-Meier curves of overall survival for our cohort when the patients are stratified by molecular subgroups, SP-MPE and SP-EPN. The median overall survival for the SP-EPN was 5.33 and was not reached for the SP-MPE. Significance levels were determined by log-rank test.

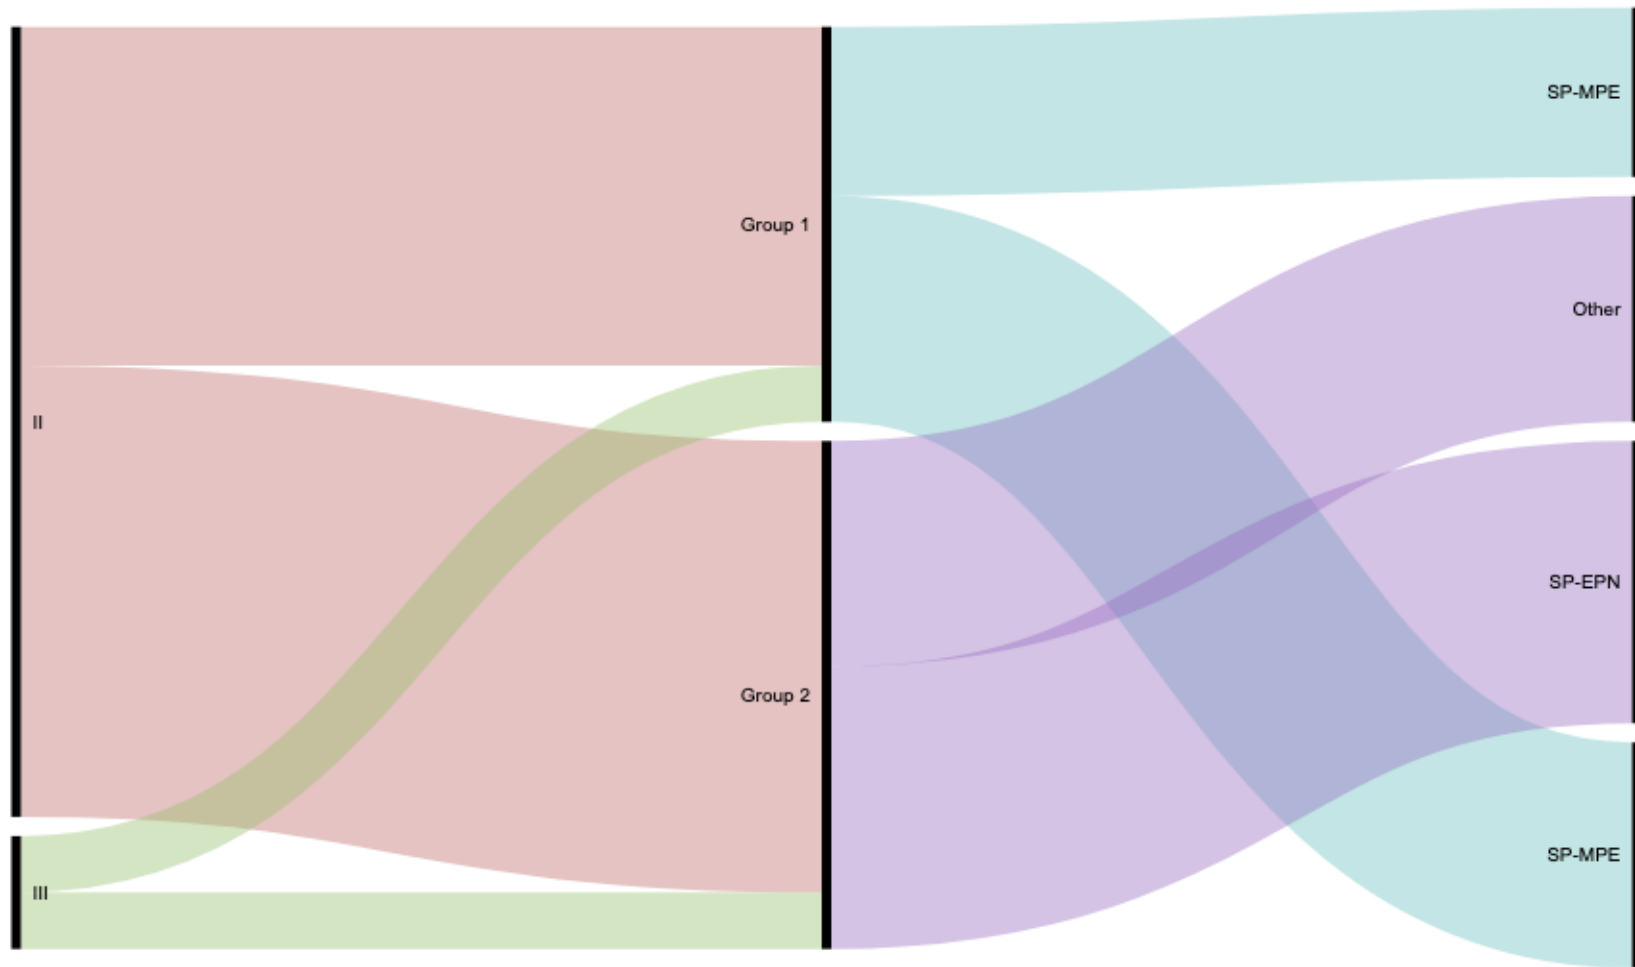

**Supplementary figure S3.** Assignment of grade II and III to molecular ependymoma subgroups based on DAN methylation profiles in our pediatric spinal ependymoma cohort.

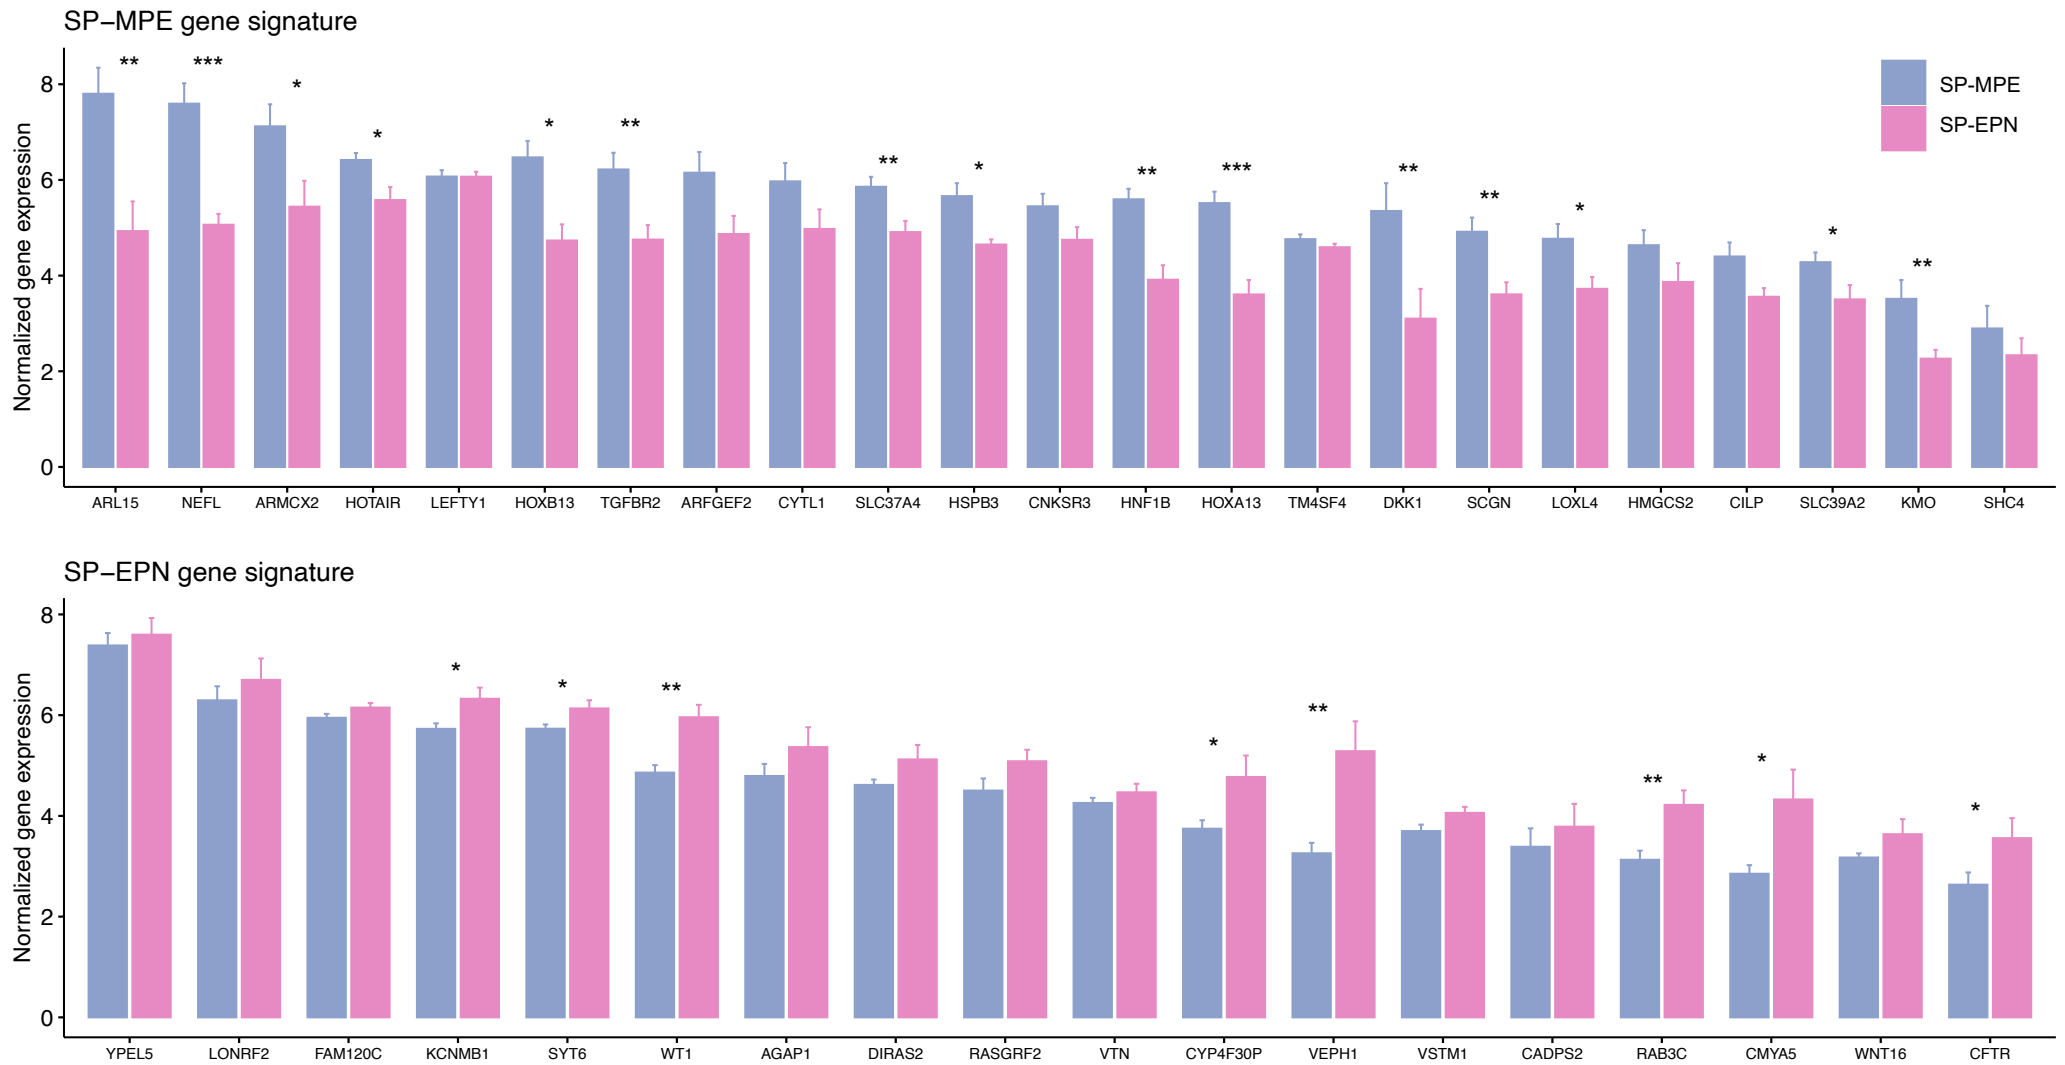

**Supplementary figure S4.** Subgroup-associated gene signature. Bar plot shows the expression levels of signature genes for SP-MPE (top) and SP-EPN subgroups (bottom). The subgroup-specific gene signatures were obtained from the previously published study by Pajtler et.al (2015). The Wilcoxon signed-rank test was used and p values (\*:  $p < 0.05$ ; \*\*:  $p < 0.01$ ; \*\*\*:  $p < 0.001$ ) on the top indicate whether there was a significant difference in the distribution of expression values across the two subgroups, SP-MPE and SP-EPN. The p values for all SP-MPE signature genes remain significant after adjusting for multiple comparisons (false discovery rate, FDR) using the Benjamini-Hochberg adjustment whereas only three genes: *RAB3C*, *VEPH1* and *WT1* remain significant for the SP-EPN gene signature at the  $FDR < 0.05$ .

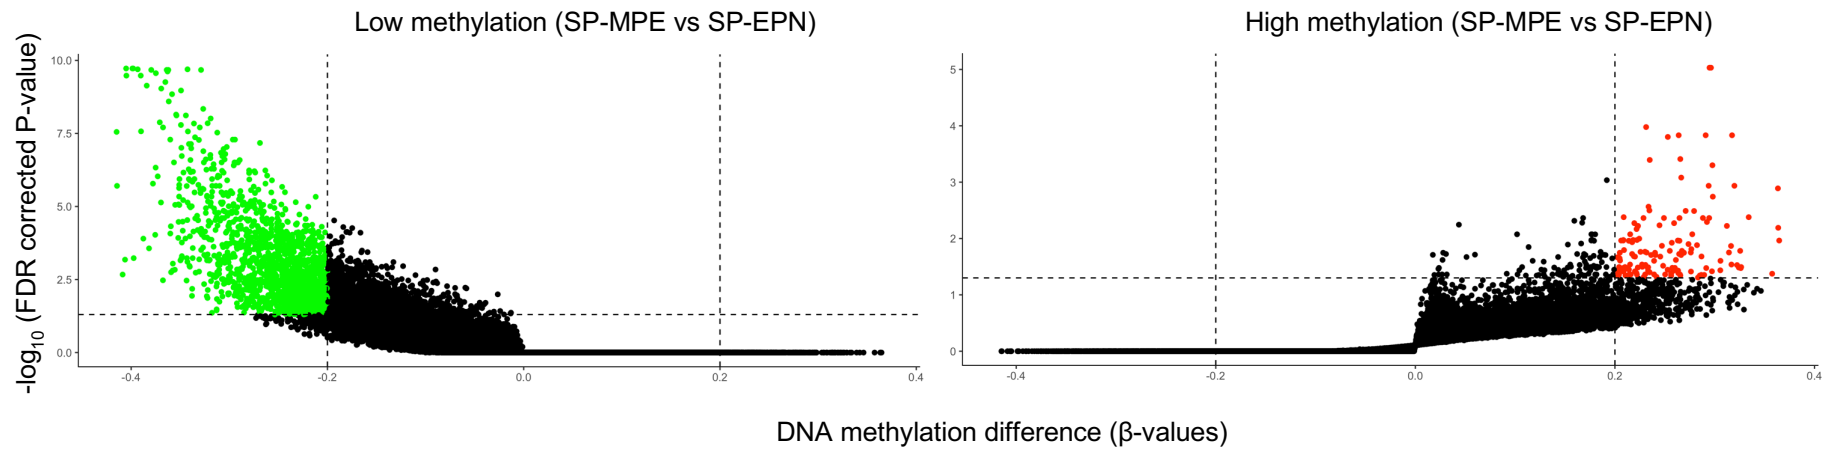

**Supplementary figure S5.** Differential methylated distal probes. Volcano plots showing DNA methylation differences (x-axis) and their statistical significance (y-axis) between SP-MPE and SP-EPN subgroups. Probes with low (left) and high (right) methylation levels in SP-MPE when compared to the SP-EPN subgroup are shown.

### Correspondence between probe DNA methylation and distal gene expression

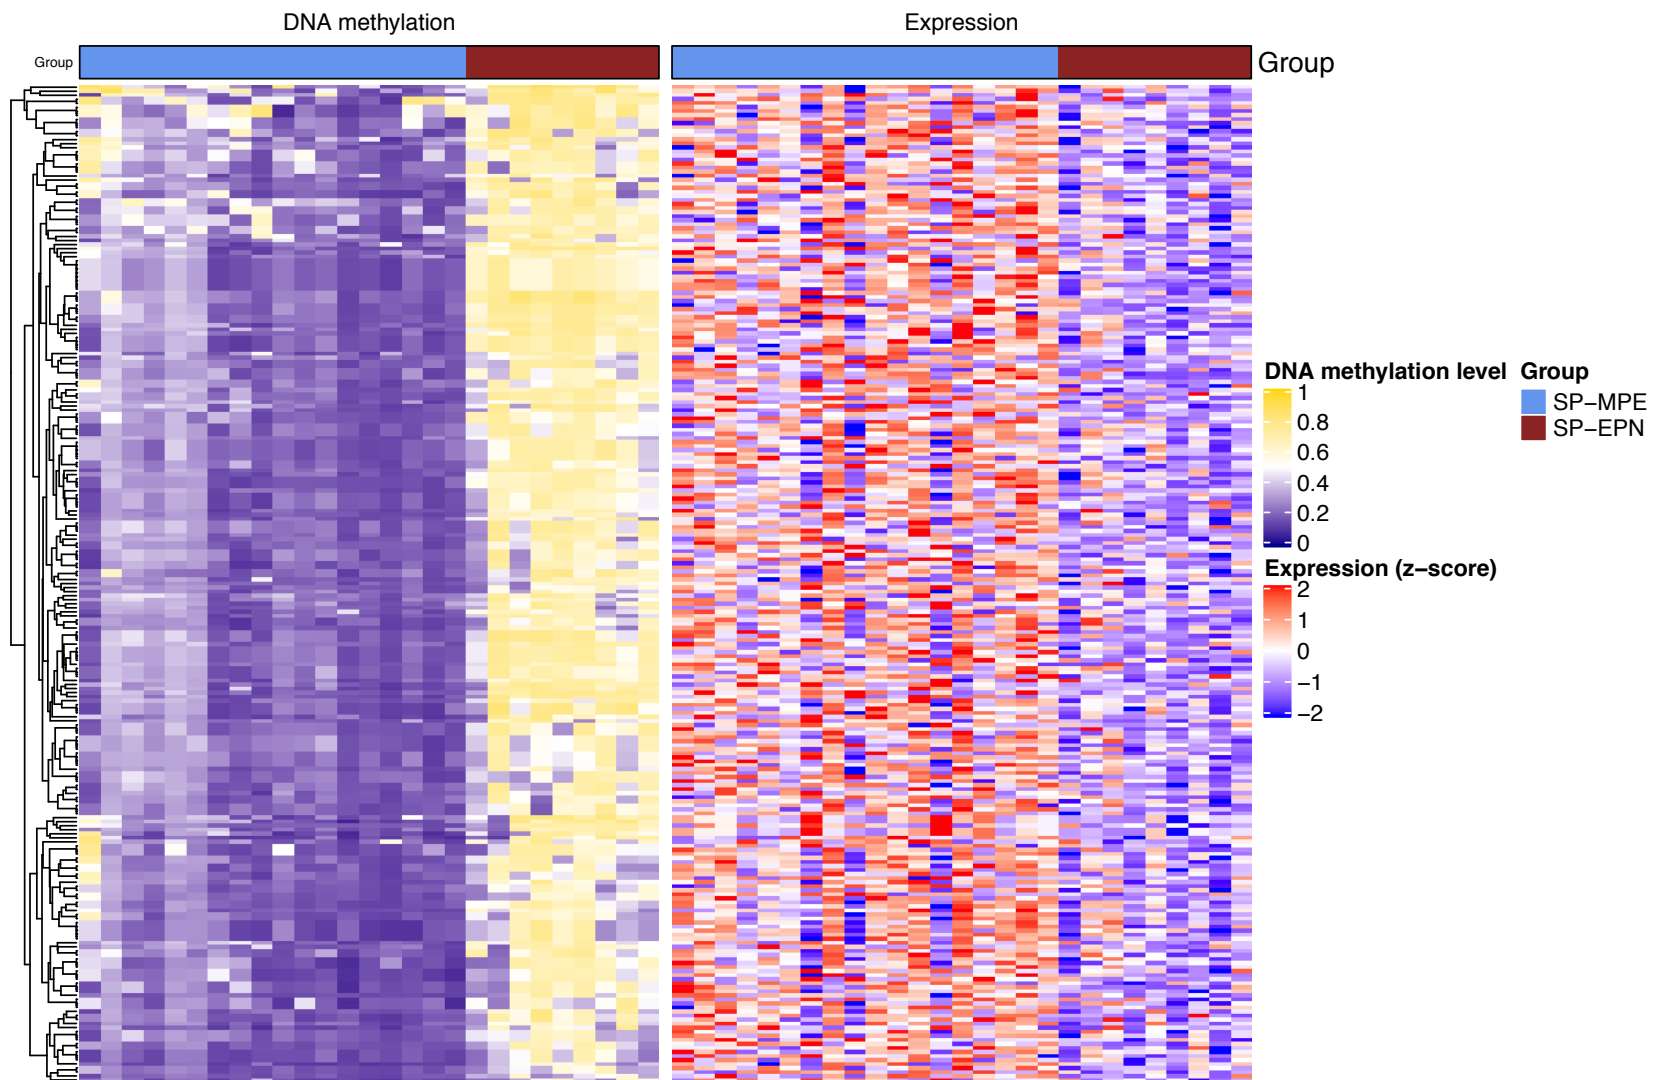

**Supplementary figure S6.** Probe-gene pairs showing inverse correlation between methylation and gene expression. Shown are the heatmaps for the significant DNA methylation probes (left) and gene expression (right) pairs at FDR < 0.05.
